# Supplementary material
Source: ML conference proceedings conference paper supplement (https://openreview.net/forum?id=LNtqwM0_Arp)
Supplement: supplementary_material [file attachment]

Appendix

Appendix A: Visualization designs

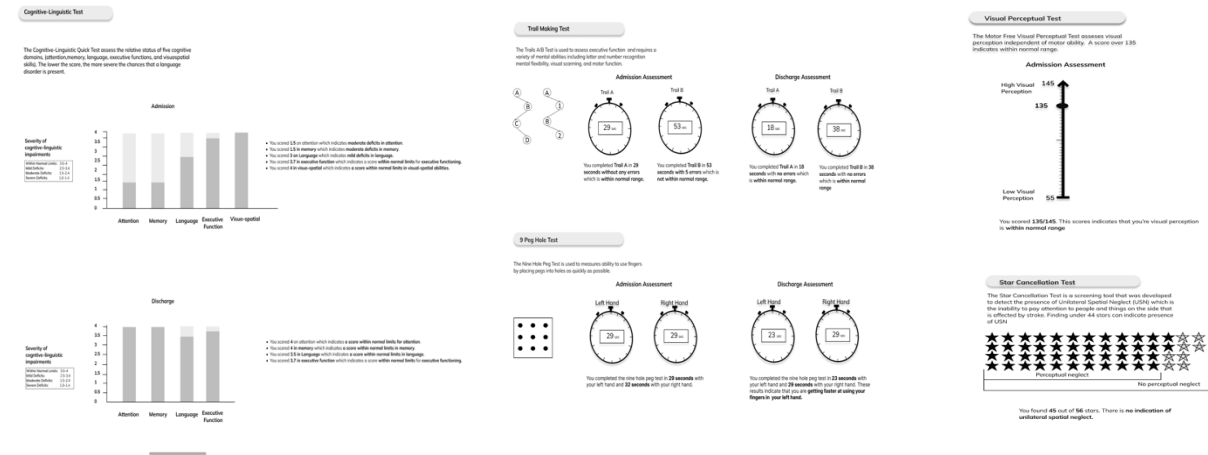

Figure 1: Visualization designs representing rehabilitation progress in cognition.

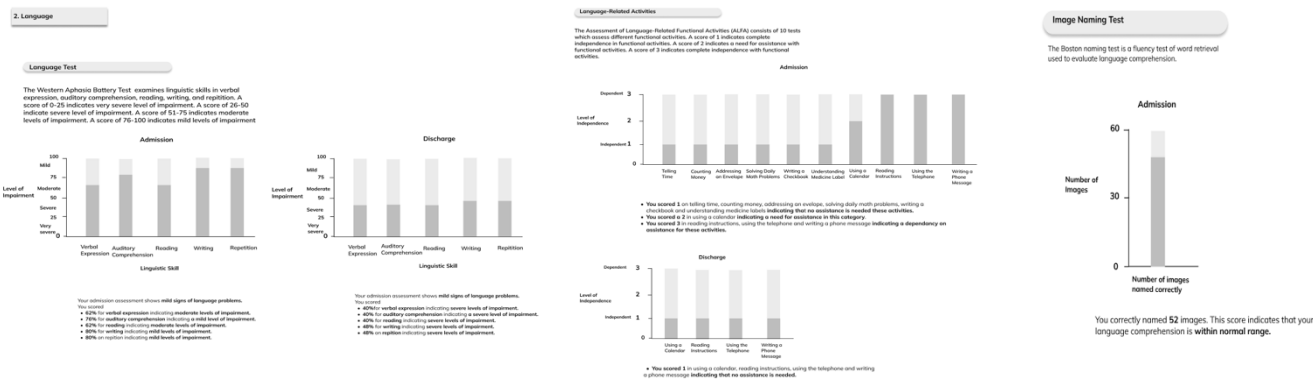

Figure 2: Visualization designs representing rehabilitation progress in language.

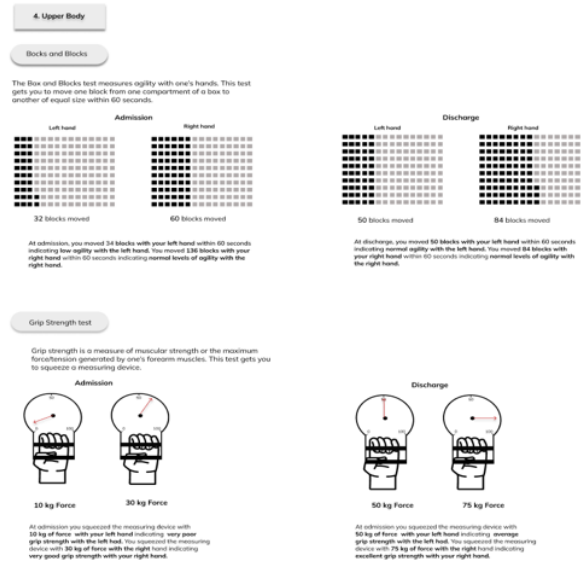

Figure 3: Visualization designs representing rehabilitation progress in the upper body.

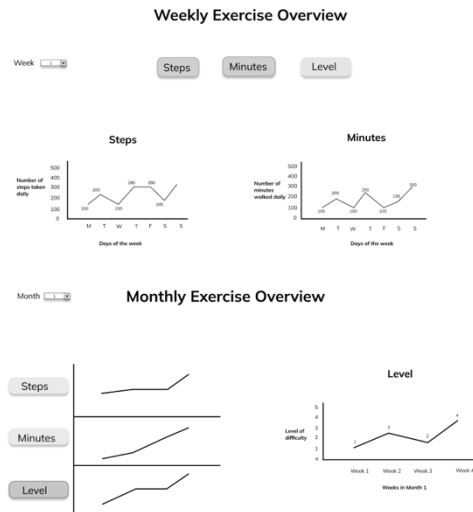

Figure 4: Visualization designs representing rehabilitation progress in the exercise.

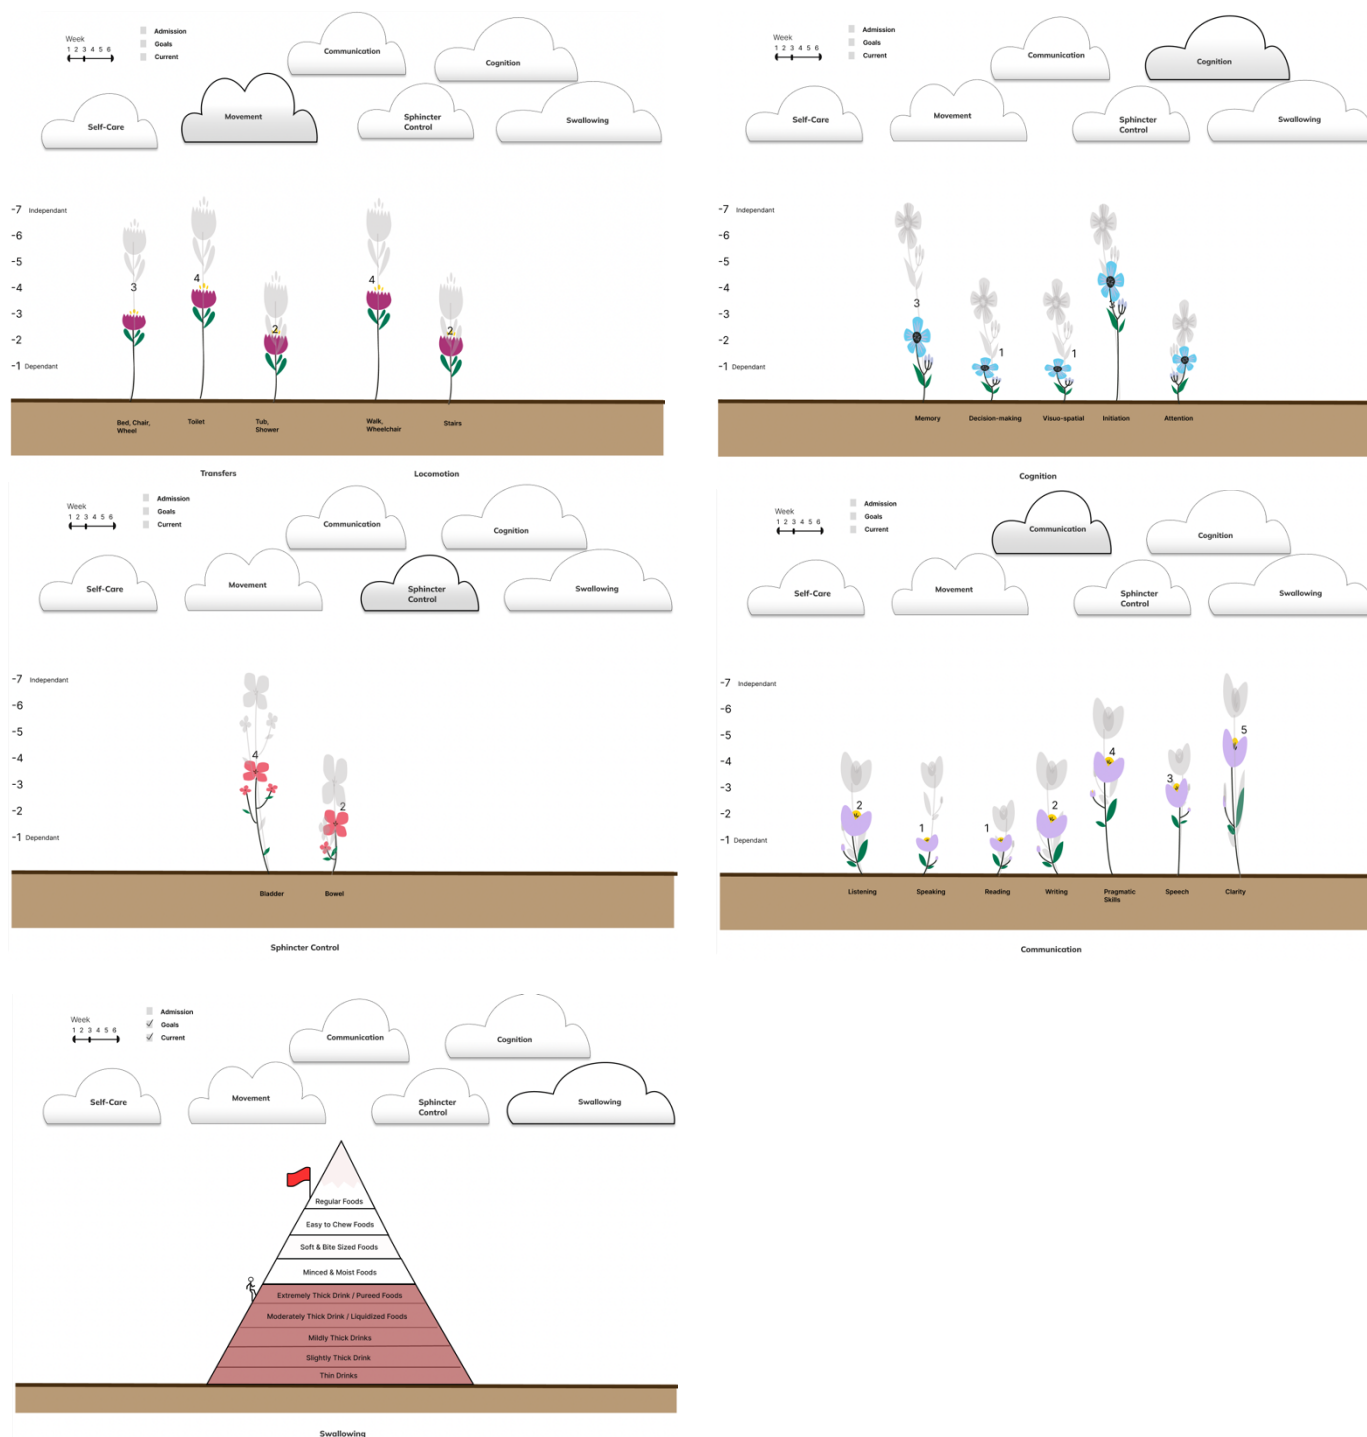

Figure 5: Visualization designs representing an overview of patient goals.

## Appendix B: Codebooks

### Codebook 1: Interviews with Healthcare Providers

| Code                                                                                                        | Description                                                                                                                                                                                                |
|-------------------------------------------------------------------------------------------------------------|------------------------------------------------------------------------------------------------------------------------------------------------------------------------------------------------------------|
| <b>1 Mediums to communicate health progress to patients</b>                                                 | <b>Codes in this category relate to ways in which healthcare providers (HPs) communicate rehabilitation results and progress to patients.</b>                                                              |
| 1.1 Communication board                                                                                     | Communication boards in every room display patient names, discharge dates, mobility, and transfer abilities.                                                                                               |
| 1.2 Verbal communication (synchronous)                                                                      | HPs use verbal communication to discuss rehabilitation progress with patients.                                                                                                                             |
| 1.3 Written notes (asynchronous)                                                                            | HPs share handwritten notes with patients to show their progress.                                                                                                                                          |
| <b>2 Types of content communicated to patient</b>                                                           | <b>Codes in this category relate to types of content that HPs communicate to patients recovering from a stroke.</b>                                                                                        |
| 2.1 Baseline test results                                                                                   | HPs communicate baseline test results with patients.                                                                                                                                                       |
| 2.2 Goals of rehabilitation                                                                                 | HPs discuss the goals of rehabilitation services with patients.                                                                                                                                            |
| 2.3 Health scores                                                                                           | HPs use objective data like health scores to remind patients of their rehabilitation status.                                                                                                               |
| 2.4 Discharge summaries                                                                                     | HPs provide patients with written updates of discharge summaries.                                                                                                                                          |
| 2.5 Comparisons between initial health assessment and final assessment                                      | HPs provide patients with a written document that compares the initial health assessment to the final assessment to show progress.                                                                         |
| 2.6 Weekly rounds report                                                                                    | HPs discuss weekly rounds with patients.                                                                                                                                                                   |
| <b>3 information provided in a patients' weekly progress report</b>                                         | <b>Codes in this category are related to information in a weekly progress report that HPs complete together.</b>                                                                                           |
| 3.1 Weekly goal setting                                                                                     | HPs discuss rehabilitation goal setting for patients.                                                                                                                                                      |
| 3.2 Discuss the patients' level of function at admission and changes in function over time                  | Healthcare providers discuss the level of function in a patient at admission and progress in the level of function over time.                                                                              |
| 3.3 Categories in weekly progress report based on the Functional Independence Measure (FIM) categories      | Healthcare providers discuss categories of patients' health similar to categories found in the FIM test.                                                                                                   |
| 3.3 Physiotherapist (PT) discusses patients' physical function                                              | PT fills out sections in weekly report related to physical function like mobility, lower limb function, upper limb function transfer, walking ability, if the patient can do stairs, bed mobility, balance |
| 3.4 Speech-Language Pathologist (SLP) discusses patient's communication, language, and swallowing abilities | SLP fills out sections in weekly rounds report related to patient's communication language, and swallowing abilities.                                                                                      |

|                                                                                                                                                                                                    |                                                                                                                                                |
|----------------------------------------------------------------------------------------------------------------------------------------------------------------------------------------------------|------------------------------------------------------------------------------------------------------------------------------------------------|
| 3.5 Occupational Therapists (OT) discusses patient's activities of daily living (ADL), instrumental activities of daily living (IADL), cognition-perceptual functions and visual-spatial functions | OT fills out sections in weekly rounds related to patient's ADL, IADL, cognition-perceptual and visual-spatial functions.                      |
| <b>4 Attempts to increase patient engagement</b>                                                                                                                                                   | <b>Codes in this category relate to ways in which HPs attempt to increase patient engagement in rehabilitation process.</b>                    |
| 4.1 Giving patients handwritten summary notes                                                                                                                                                      | HPs give patients handwritten summary notes, to keep patients engaged.                                                                         |
| 4.2 Communicating test scores to patients                                                                                                                                                          | Providing patients with test scores is fundamental for engagement.                                                                             |
| 4.3 Positive reinforcement                                                                                                                                                                         | HPs use positive reinforcement to motivate patients in their recovery process.                                                                 |
| 4.4 Scoring health status in front of patients                                                                                                                                                     | HPs will score and explain patient's assessment results right in front of the patient so that the patient better understands their results.    |
| 4.5 Educating patients about stroke                                                                                                                                                                | Healthcare providers focus on increasing education and awareness about stroke to increase patient understanding and engagement.                |
| 4.6 Using simple language to describe progress to patients                                                                                                                                         | Healthcare providers use simple language to communicate scores to patients to increase patient understanding.                                  |
| 4.7 Virtual Reality (VR) for engagement in physical rehabilitation                                                                                                                                 | PT uses VR games to promote engagement in rehabilitation exercise.                                                                             |
| 4.8 Patients can see physician reports through Electronic Medical Records (EMR)                                                                                                                    | Patients can stay informed on reports from physicians by seeing them through an online portal.                                                 |
| <b>5 Issues with technology to store and access patient health data</b>                                                                                                                            | <b>Codes in this category relate to challenges that HPs face regarding issues with technology storage and accessing patient health data.</b>   |
| 5.1 Difficulty accessing patient information from other healthcare providers                                                                                                                       | Accessing EMR between OT, PT, SLP can sometimes be difficult if they have not uploaded documents or if they are uploaded in unfamiliar places. |
| 5.2 EMR system is not organized cohesively making it difficult to find patient information                                                                                                         | EMR are stored in different places and are sometimes fragmented.                                                                               |
| 5.3 No overview of patient data                                                                                                                                                                    | There is no overview of patient health data in EMR.                                                                                            |
| 5.4 No standard template for summarizing patient health progress                                                                                                                                   | HPs do not have an automated template for patient results.                                                                                     |
| 5.5 Patient information is not readily accessible                                                                                                                                                  | HPs think it would be beneficial to have a screen in every room to have information readily accessible.                                        |
| 5.6 Tracking exercise and cardiovascular health is limited without fitness tracker                                                                                                                 | PT think that every patient should have a Fitbit to track their cardiovascular health and exercise.                                            |
| <b>6 Inpatient treatment protocol and therapies</b>                                                                                                                                                | <b>Codes in this category relate to inpatient treatment protocol and types of therapy that patients receive.</b>                               |

|                                                                                                       |                                                                                                                                                                                                              |
|-------------------------------------------------------------------------------------------------------|--------------------------------------------------------------------------------------------------------------------------------------------------------------------------------------------------------------|
| 6.1 General protocol: Assess patient status and determine goals                                       | First assessment starts with assessing the patient's status, then goals are created based on their rehabilitation status, health, mobility, ability to transfer, and ability to provide care for themselves. |
| 6.2 Treatment amount depends on the severity of problem                                               | The number of therapy sessions depends on the severity of the patients' problem.                                                                                                                             |
| 6.3 Physiatrist's protocol                                                                            | Physiatrist's treatment protocol for caring for patients after a stroke.                                                                                                                                     |
| 6.3.1 Assessment of patient's health status                                                           | Physiatrists assess patients' individual medical situations that could interfere with rehabilitation like a painful shoulder, a painful neck, or a painful back swelling.                                    |
| 6.3.2 Assessment of the comorbidities of patients                                                     | Physiatrists assess comorbidities like blood pressure, diabetes and lipids, fever, swelling, and complex regional pain syndrome.                                                                             |
| 6.3.3 Using SOAP (Subjective, Objective, Assessment, and Plan) method to document a medical situation | Physiatrists use the SOAP method as a standardized worldwide method for documenting a medical situation.                                                                                                     |
| 6.3.4 Monitoring patients daily                                                                       | Physiatrists see patients daily to assess their health status.                                                                                                                                               |
| 6.4 PT protocol                                                                                       | PT treatment protocol for caring for patients after a stroke.                                                                                                                                                |
| 6.4.1 Assessment of patient's ability to transfer, stand and walk                                     | PT assesses patients' ability to transfer in and out of bed, patients' ability to stand and walk.                                                                                                            |
| 6.4.2 Timeline of patient assessment after admission                                                  | Within the first 3 days of admission, PTs assess the patients' social and home environment, their mobility, occupation, what activities they enjoy, and muscular strength.                                   |
| 6.4.3 Using Virtual Reality (VR) to promote physical rehabilitation                                   | PT leads a program in the VR therapy unit for patients recovering from stroke to promote exercise and engagement.                                                                                            |
| 6.4.4 giving patients exercise programs                                                               | PT gives patients exercise programs to increase cardiovascular health.                                                                                                                                       |
| 6.4.5 assessments of patient's muscular strength                                                      | PT assesses a patient's muscular strength.                                                                                                                                                                   |
| 6.4.6 Asking patients to use fitness equipment                                                        | PT asks patients to use fitness equipment like a bike and treadmill for exercise.                                                                                                                            |
| 6.4.7 Duration of treatment                                                                           | Patients receive 5 therapy sessions a week with a PT.                                                                                                                                                        |
| 6.5 SLP protocol                                                                                      | SLP treatment protocol for caring for patients after a stroke.                                                                                                                                               |
| 6.5.1 Assessing of difficulty with speech, language, and swallowing                                   | Patients get access to a SLP if they have problems with language, speech or swallowing.                                                                                                                      |
| 6.5.2 Duration of treatment                                                                           | Patients receive 2-5 therapy sessions a week with a SLP.                                                                                                                                                     |
| 6.6 OT Protocol                                                                                       | Occupational therapy treatment protocol for caring for patients after a stroke.                                                                                                                              |
| 6.6.1. Assessing patient's capacity to perform everyday tasks                                         | OT assesses patients' capacity to perform tasks (ADL and IADL) and compare it with their pre-stroke self-reported abilities.                                                                                 |

|                                                                                                                 |                                                                                                                                                                                                                                       |
|-----------------------------------------------------------------------------------------------------------------|---------------------------------------------------------------------------------------------------------------------------------------------------------------------------------------------------------------------------------------|
| 6.6.2. Improving patient's functional capacity, ADL and IADL                                                    | OT focuses on improving patient's functional capacity in their ADL (personal hygiene or grooming, dressing, toileting, transferring, eating) and IADL (managing finances, medications, food preparation, house-keeping, and laundry). |
| 6.6.3 Assessing cognitive functioning                                                                           | OT assesses a patient's cognitive-perceptual functioning.                                                                                                                                                                             |
| 6.6.4 Helping patients learn strategies to manage cognitive, perceptual, and behavioural changes after a stroke | OT helps patients learn strategies to manage behavioural, cognitive, and perceptual changes associated with stroke.                                                                                                                   |
| 6.6.5 Preparing the home and work environment for patient's return                                              | OT prepares the home and work environment for patient's return after a stroke.                                                                                                                                                        |
| 6.6.6 Improving patient's motor control and hand function                                                       | OT focuses on improving the patient's motor control and hand function in the stroke-affected upper limb.                                                                                                                              |
| 6.6.7 Duration of treatment                                                                                     | Patients receive 3-5 therapy sessions a week with an OT.                                                                                                                                                                              |
| 6.7 Nurse's protocol                                                                                            | Nurse's treatment protocol caring for patients after a stroke.                                                                                                                                                                        |
| 6.7.1 Helping pain management, assistance with mobilization, assistance with medication administration, and ADL | Nurses help with a range of rehabilitation services including pain management, assistance with mobilization, assistance with medication administration, and ADL.                                                                      |
| 6.7.2 Role of Nurse                                                                                             | Nursing is a fundamental component. Inpatients get cared for by nurses every day.                                                                                                                                                     |

**Codebook 2: Types of Health assessments used by healthcare providers**

| Code                                                             | Description                                                                                                                     |
|------------------------------------------------------------------|---------------------------------------------------------------------------------------------------------------------------------|
| Types of health assessments                                      | <b>Codes in this category relate to questionnaires that HPs use to assess function and rehabilitation progress in patients.</b> |
| Assessment of Language related Functional Activities (ALFA) test | ALFA test is used to test cognitive linguistic problems related to functional activities.                                       |
| Berg Balance test                                                | Berg balance test is used to test balance.                                                                                      |
| Boston Naming test                                               | Boston Naming test measures confrontational word retrieval.                                                                     |
| Chedoke McMaster Stroke Assessment Tool                          | Chedoke McMaster Stroke Assessment tool is used to measure physical impairment and activity of an individual after stroke.      |
| Cognitive Linguistic Quick test (CLQT)                           | CLQT is used to test cognitive-linguistic problems.                                                                             |
| Functional Independence Measure (FIM)                            | FIM is used to test the functional status of a patient based on the level of assistance they require.                           |
| Gait Speed test                                                  | Gait speed test is used to measure gait speed.                                                                                  |
| Grip Strength test                                               | Grip strength test is used to measure muscular strength.                                                                        |
| International Dysphagia Diet Standardisation Initiative (IDDSI)  | IDDSI is used to assess swallowing ability.                                                                                     |
| Montreal Cognitive Assessment test (MoCA)                        | MoCA test is used to assess cognitive impairment.                                                                               |
| Motor Free Visual-Perceptual test                                | Motor Free Visual Perceptual test is used to assess visual perception independent of motor ability.                             |
| Ross Information Processing Assessment-2 (RIPA-2)                | RIPA-2 is used to assess cognitive-linguistic deficits.                                                                         |
| Star Cancellation test                                           | Star cancellation test is used to assess unilateral spatial neglect.                                                            |
| Trail Making test                                                | Trail making test is used to assess executive function.                                                                         |
| Western Aphasia Battery (WAB) test                               | WAB is used to assess the linguistic skill and main non-linguistic skill in adults with aphasia.                                |
| 2-Minute Walk test                                               | 2-minute walk tests are used to test endurance and gait speed.                                                                  |
| 9 Peg Hole test                                                  | 9 Peg Hole test is used to assess finger dexterity.                                                                             |



**Codebook 3: Design requirements for data visualization**

| Code                                                                                                             | Description                                                                                                                                  |
|------------------------------------------------------------------------------------------------------------------|----------------------------------------------------------------------------------------------------------------------------------------------|
| <b>Design Requirements for data visualization</b>                                                                | <b>Codes in this category relate to design requirements of the data visualization representing patient health progress mentioned by HPs.</b> |
| Visualize weekly report                                                                                          | Visualizing weekly progress report would be useful since healthcare providers use it frequently.                                             |
| Visualizing patient results                                                                                      | Healthcare providers believe that visualizing assessment results and showing patients would be beneficial.                                   |
| User-Interface should have two views: patient and provider                                                       | Display weekly report visualization with two views, one for the health care workers and the second for the patient.                          |
| Compare levels of assistance in patients at intake and discharge                                                 | Display patients' level of assistance required at intake and discharge (minimum assistance, moderate assistance, maximum assistance).        |
| Display section for patient goals, admission test results, discharge test results and check-in points in between | Display section for patient goals, admission test results, discharge test results and check-in points in between.                            |
| Simple to understand patient-centered results                                                                    | Display results that are simple to understand are necessary for patients that may have lower levels of comprehension and cognition.          |

#### Codebook 4: Expert Evaluation

| Code                                                                                             | Description                                                                                                                                             |
|--------------------------------------------------------------------------------------------------|---------------------------------------------------------------------------------------------------------------------------------------------------------|
| <b>1 Clear categorization and labelling of health assessments</b>                                | <b>Codes in this category relate to the theme of clear categorization and labelling of health assessments in the visualization designs.</b>             |
| 1.1 Categorize health assessments into their corresponding health domains                        | Health assessments should be placed in their corresponding health domains.                                                                              |
| 1.2 Add signposts to categories of health assessment in the overview                             | Health assessments should be signposted to their related categories.                                                                                    |
| <b>2 Display informative scales and results</b>                                                  | <b>Codes in these categories relate to the theme of displaying informative scales and results in the visualization designs.</b>                         |
| 2.1 Display severity levels of scales                                                            | When applicable, tests should demonstrate severity levels in the scales to inform patients about the meaning of their results.                          |
| 2.2 Display health sub-domains that are relevant to the patient's rehabilitation                 | The results should demonstrate sub-domains relevant to the patient rehabilitation so that results are more informative and meaningful to them.          |
| 2.3 Record and display additional text for results of tests as applicable                        | To support patients with diet planning, additional information about diet should be included in a comment box.                                          |
| 2.4 Display meaningful context of patients results                                               | The progress findings from each health assessment tool should give meaningful context about the areas of rehabilitation that have improved or worsened. |
| <b>3 Personalize the display of information for patients</b>                                     | <b>Codes in this category relate to the theme of visualizing results that are personalized to the patient.</b>                                          |
| 3.1 Display functional independence goals                                                        | Visualization of goals should demonstrate all levels of functional independence to patients to support them in reaching specific goals.                 |
| 3.2 Enable patients to personalize their data view                                               | Allow patients to select which elements display in the visualization to reduce cognitive burden.                                                        |
| <b>4 Personalize healthcare providers choice of health assessments</b>                           | <b>Codes in this category relate to the theme of personalizing the healthcare providers choice of health assessments in the visualization designs.</b>  |
| 4.1 Visualization should demonstrate the most common tests that are used by healthcare providers | Visualization should take out tests that are not used by the healthcare providers at the hospital and add tests that are most used.                     |
